# Supplementary material for: Pogostone Enhances the Antibacterial Activity of Colistin against MCR-1-Positive Bacteria by Inhibiting the Biological Function of MCR-1
Source: MDPI journal article supplement (doi:10.3390/molecules27092819), 2022-04-28
Supplement: s1 [file s1]

## *Supplementary Materials*

# **Pogostone Enhances the Antibacterial Activity of Colistin against MCR-1-Positive Bacteria by Inhibiting the Biological Function of MCR-1**

Shengnan Xie <sup>1,†</sup>, Li Li <sup>1,†</sup>, Baihe Zhan <sup>1</sup>, Xue Shen <sup>2</sup>, Xuming Deng <sup>1</sup>, Wenxi Tan <sup>3,\*</sup> and Tianqi Fang <sup>1,2,\*</sup>

<sup>1</sup> Key Laboratory of Zoonosis Research, Ministry of Education, Institute of Zoonosis, College of Veterinary Medicine, Jilin University, Changchun 130062, China

<sup>2</sup> Department of Food Quality and Safety, Jilin University, Changchun 130062, China

<sup>3</sup> Department of Obstetrics and Gynecology, The Second Hospital of Jilin University, Changchun 130041, China

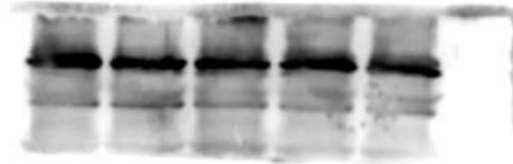

**Figure S1.** *E.coli* BL21(DE3) (pET28a-*mcr-1*)-(4 h).

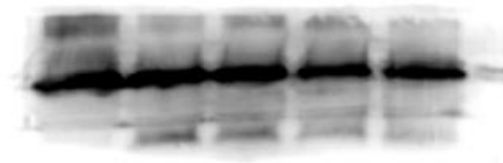

**Figure S2.** *E.coli* BL21(DE3) (pET28a-*mcr-1*)-(8 h).



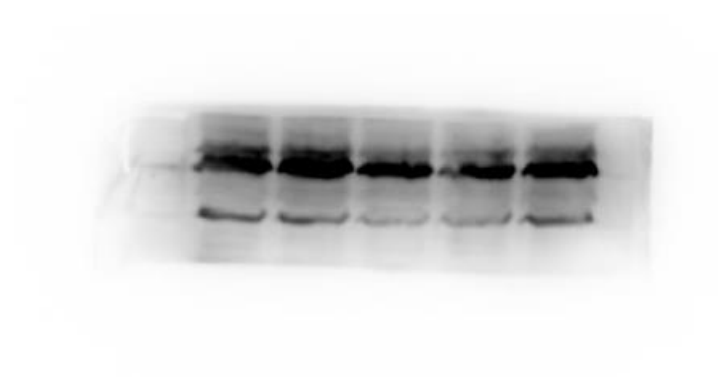

**Figure S3.** *E.coli* ZJ487-(4 h).

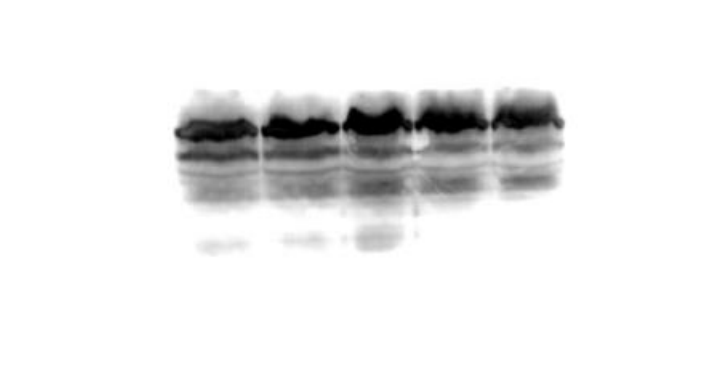

**Figure S4.** *E.coli* ZJ487-(8 h).

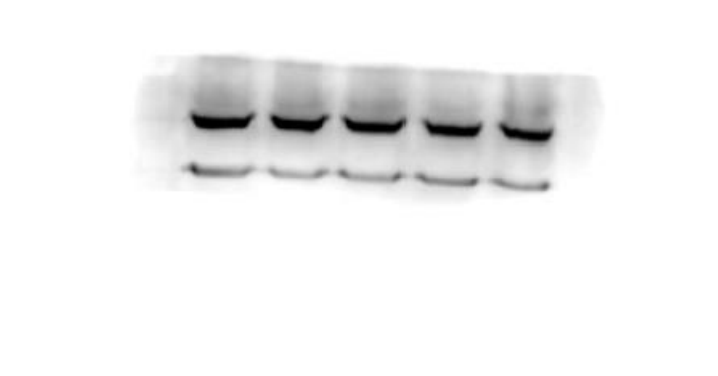

**Figure S5.** *K.pneumoniae* ZJ02-(4 h).



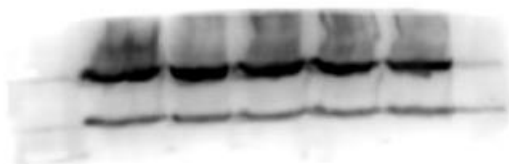

**Figure S6.** *K.pneumoniae* ZJ02-(8 h).

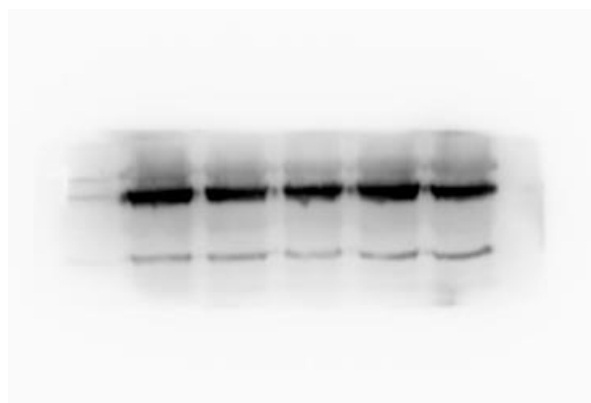

**Figure S7.** *S. typhimurium* HYM2-(4 h).

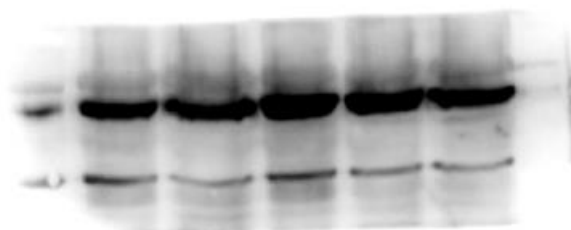

**Figure S8.** *S. typhimurium* HYM2-(8 h).
